# Supplementary material for: Comparing Bayesian-Based Reconstruction Strategies in Topology-Based Pathway Enrichment Analysis
Source: MDPI journal article supplement (doi:10.3390/biom12070906), 2022-06-28
Supplement: s1 [file s1]

---

**Table S1** BPA Reconstruction

---

**Input:** KEGG pathway with node list  $N$  and edge list  $E$ ;

- 1:  $seeds = \{\}$ ;
- 2: **Initialization** cyclic graph  $G$  with nodes  $N$  and edges  $E$ ;
- 3: Run Tarjan's algorithm to detect all cyclegroups  $(C_1, C_2, \dots, C_n)$ ;
- 4: Remove all edges connecting nodes in the same cyclegroup;
- 5: **for**  $C_i$  in  $(C_1, C_2, \dots, C_n)$  **do**
- 6:     Randomly number each node inside  $C_i$  from small to large;
- 7:     Add an edge from each lower number node to each higher number node;
- 8:     For each parent  $A$  of a member of the cycle group that is not itself in the cyclegroup, add an edge from  $A$  to each member of the cyclegroup;
- 9: **end for**

**Output:** Reconstructed pathway directed acyclic graph.

---

---

**Table S2** PROPS Reconstruction

---

**Input:** KEGG pathway with node list  $N$  and edge list  $E$ ;

- 1:  $seeds = \{\}$ ;
- 2: **Initialization** empty graph  $G$  with nodes  $N$  from the input pathway;
- 3: **while**  $E \neq \emptyset$  **do**
- 4:     Randomly select  $e_i$  from  $E$ ;
- 5:     Add  $e_i$  to the graph  $G$ ;
- 6:     **if** cyclic( $G$ ) **then**
- 7:         Remove  $e_i$  from the graph  $G$ ;
- 8:     **end if**
- 9:     Remove  $e_i$  from the edge list  $E$ ;
- 10: **end while**

**Output:** Reconstructed pathway directed acyclic graph.

---

---

**Table S3** Clipper Reconstruction

---

**Input:** KEGG pathway with node list  $N$  and edge list  $E$ , healthy RNA-seq data  $H$ ; 1: **for**  $n_i$  in  $N$  **do**

- 2:     Extract parent node set  $N_p$  for  $n_i$  according to the edge list;
- 3:     Extract corresponding expression data from healthy samples ( $H_{N_p}$  and  $H_{n_i}$ ) for parent genes  $N_p$  and children gene  $n_i$ ;

```

4:      Fit linear regression model for healthy samples  $\text{lm}(H_{n_i} \sim H_{N_p})$ ;
5:      for  $n_j$  in  $N_p$  do

6:          Assign  $p$ -value  $p_{n_j}$  to the edge from  $n_j$  to  $n_i$ ;
7:          end for 8: end for
9: Sort the list of edges in ascending  $p$ -value order;
10: Initialization empty graph  $G$  with nodes  $N$  from the input pathway;
11: while  $E \neq \emptyset$  do
12:     Add edge  $e_i$  to the graph  $G$  in ascending  $p$ -value order;
13:     if  $\text{cyclic}(G)$  then
14:         Remove  $e_i$  from the graph  $G$ ;
15:     end if
16:     Remove  $e_i$  from the edge list  $E$ ;
17: end while
Output: Reconstructed pathway directed acyclic graph.

```

---

**Table S4** BNrich Reconstruction

---

**Input:** KEGG pathway with node list  $N$  and edge list  $E$ , healthy and disease RNA-seq data  $H$  and  $D$ ;

**Stage 1:** Eliminate edges through biological approaches;

```

1: for  $e_i$  in  $E$  do
2:     if (
3:          $e_i$  connects two nodes with same label;
4:          $e_i$  originates from nucleus resulting in cycle formation;
5:          $e_i$  is opposite of the signaling flux direction and would lead to cycle ;
6:     ) {
7:         Remove  $e_i$  from the edge list;
8:     }
9: end for

```

**Stage 2:** Simplify structure by LASSO

```

10: for  $n_i$  in  $N$  do
11:     Extract parent node set  $N_p$  for  $n_i$  according to the edge list;
12:     Extract corresponding expression data from healthy ( $H_{N_p}$  and  $H_{n_i}$ ) and disease
        ( $D_{N_p}$  and  $D_{n_i}$ ) samples for parent genes  $N_p$  and children gene  $n_i$ ;
13:     Fit regression model for healthy and disease sample separately
         $\text{LASSO}(H_{n_i} \sim H_{N_p})$  and  $\text{LASSO}(D_{n_i} \sim D_{N_p})$ ;

```

```

14:   for  $n_j$  in  $N_p$  do
15:       if  $\beta_{nj} = 0$  in both models then
16:           Remove the edge from  $n_j$  to  $n_i$ ;
17:       end if 18:       end for 19: end for
Output: Simplified pathway directed acyclic graph.

```

---

**Table S5** Ensemble Reconstruction

---

**Input:** KEGG pathway with node list  $N$  and edge list  $E$ ;

```

1:  $seeds = \{\}$ ;
2: Initialization cyclic graph  $G$  with nodes  $N$  and edges  $E$ ;
3: Run Tarjan's algorithm to detect all strongly connected components (SCCs)
   ( $SCC_1, SCC_2, \dots, SCC_n$ );
4: for metric in (TrueSkill, Social Agony) do
5:   for strategy in (Forward, Backward, Greedy) do
6:     for  $SCC_i$  in ( $SCC_1, SCC_2, \dots, SCC_n$ ) do
7:       if metric == TrueSkill then 8:
         For each edge  $(u, v)$ :
9:           if  $v$  has a higher skill level than  $u$  (expected) then
10:             Update the skill level  $\mu$  and  $\sigma$  of  $u$  by a small amount;
11:           else
12:             Update the skill level  $\mu$  and  $\sigma$  of  $u$  to a large extent;
13:           end if
14:             The ranking score of node  $u$  is defined as  $\mu_u - 3\sigma_u$ ;
15:           else if metric == Social Agony then
16:             Update ranking scores of each node by minimizing the total agony:
17:                $A(G) = \min_r \left( \sum_{(u,v) \in E} \max(r(u) - r(v) + 1, 0) \right)$ 
18:           end if
19:           if strategy == Forward then
20:             Select the node  $v$  which has the highest ranking score in  $SCC_i$ ;
21:             Remove its all out edges in  $SCC_i$ ; 22:
           else if strategy == Backward then
23:             Select the node  $v$  which has the lowest ranking score in  $SCC_i$ ;
24:             Remove its all in edges in  $SCC_i$ ;
25:           else if strategy == Greedy then
26:             Select the edge with the highest difference in ranking score
27:             between the starting and ending nodes to remove;

```

---

```
28:      end if 29:      end for 30:      end for 31: end for
32: For each edge  $(u,v)$ , add the number of removals under the 6 conditions;
33: Remove edge in the order of highest to lowest voting scores until the graph
    becomes acyclic;
Output: Reconstructed pathway directed acyclic graph.
```
