# Supplementary material for: Comparing Bayesian-Based Reconstruction Strategies in Topology-Based Pathway Enrichment Analysis
Source: MDPI journal article supplement (doi:10.3390/biom12070906), 2022-06-28
Supplement: s1 [file s1]

**Supplementary Table S1.** The top ten pathways enriched by any of the five BN reconstruction methods in HNSC dataset.

| Pathway Name                                         | Rank in BNrich | Rank in PROPS | Rank in Clipper | Rank in BPA | Rank in Ensemble |
|------------------------------------------------------|----------------|---------------|-----------------|-------------|------------------|
| Adherens junction                                    | 60             | 65            | 69              | 4           | 65               |
| AGE-RAGE signaling pathway in diabetic complications | 15             | 7             | 8               | 31          | 5                |
| Alcoholism                                           | 14             | 9             | 9               | 25          | 6                |
| Axon guidance                                        | 56             | 39            | 65              | 7           | 42               |
| Basal cell carcinoma                                 | 140            | 11            | 43              | 35          | 9                |
| Central carbon metabolism in cancer                  | 6              | 34            | 12              | 19          | 11               |
| Chemical carcinogenesis - DNA adducts                | 5              | 3             | 3               | 2           | 7                |
| Chemokine signaling pathway                          | 4              | NA            | NA              | NA          | NA               |
| Circadian entrainment                                | 25             | 27            | 10              | 27          | 80               |
| ECM-receptor interaction                             | 2              | 1             | 1               | 3           | 2                |
| Endocrine resistance                                 | 16             | 8             | 4               | 5           | 4                |
| Focal adhesion                                       | 10             | NA            | NA              | NA          | NA               |
| JAK-STAT signaling pathway                           | 1              | NA            | NA              | NA          | NA               |
| MAPK signaling pathway                               | 8              | 41            | 50              | NA          | 31               |
| NF-kappa B signaling pathway                         | 42             | 12            | 57              | 8           | 37               |
| p53 signaling pathway                                | 7              | 51            | 35              | 21          | 25               |
| Pancreatic cancer                                    | 34             | 5             | 5               | 9           | 24               |
| PI3K-Akt signaling pathway                           | 3              | 2             | 2               | 1           | 1                |
| Prostate cancer                                      | 18             | 10            | 13              | 22          | 10               |
| Ras signaling pathway                                | 9              | 17            | 53              | 34          | 19               |
| Regulation of actin cytoskeleton                     | 12             | 16            | 11              | 6           | 8                |
| Small cell lung cancer                               | 145            | 4             | 7               | 15          | 3                |
| Type II diabetes mellitus                            | 98             | 99            | 40              | 10          | 101              |
| Wnt signaling pathway                                | 11             | 6             | 6               | 13          | 12               |

\*NA: Pathways failed to be reconstructed into Bayesian network.

**Supplementary Table S2.** The top ten pathways enriched by any of the five BN reconstruction methods in KIRC dataset.

| Pathway Name                              | Rank in<br>BNrich | Rank in<br>PROPS | Rank in<br>Clipper | Rank in<br>BPA | Rank in<br>Ensemble |
|-------------------------------------------|-------------------|------------------|--------------------|----------------|---------------------|
| Adherens junction                         | 19                | 3                | 23                 | 19             | 12                  |
| Adipocytokine signaling pathway           | 10                | 93               | 19                 | 54             | 26                  |
| Cell adhesion molecules                   | 33                | 10               | 28                 | 16             | 40                  |
| Chemokine signaling pathway               | 85                | 6                | 7                  | 11             | 6                   |
| Circadian entrainment                     | 49                | 15               | 25                 | 4              | 10                  |
| ECM-receptor interaction                  | 2                 | 8                | 6                  | 13             | 2                   |
| EGFR tyrosine kinase inhibitor resistance | 7                 | 45               | 9                  | 5              | 17                  |
| Insulin resistance                        | 29                | 5                | 16                 | 30             | 16                  |
| JAK-STAT signaling pathway                | 18                | NA               | 8                  | 3              | 5                   |
| Longevity regulating pathway              | 6                 | 9                | 22                 | 9              | 30                  |
| Long-term depression                      | 8                 | 28               | 13                 | 21             | 24                  |
| MAPK signaling pathway                    | 3                 | 27               | 49                 | 39             | 51                  |
| Morphine addiction                        | 14                | 1                | 12                 | 2              | 13                  |
| NF-kappa B signaling pathway              | 56                | 7                | 68                 | 90             | 124                 |
| Pathways in cancer                        | 16                | 14               | 2                  | 6              | 9                   |
| PI3K-Akt signaling pathway                | 1                 | 26               | 3                  | 14             | 3                   |
| Prostate cancer                           | 9                 | 17               | 11                 | 10             | 8                   |
| Rap1 signaling pathway                    | 5                 | 13               | 5                  | 8              | 7                   |
| Ras signaling pathway                     | 4                 | 11               | 4                  | 12             | 4                   |
| Regulation of actin cytoskeleton          | 21                | 4                | 31                 | 24             | 15                  |
| Retrograde endocannabinoid signaling      | 113               | 2                | 1                  | 1              | 1                   |
| Small cell lung cancer                    | 11                | 12               | 10                 | 7              | 11                  |

\*NA: Pathways failed to be reconstructed into Bayesian network.

**Supplementary Table S3.** The top ten pathways enriched by any of the five BN reconstruction methods in LUAD dataset.

| Pathway Name                                         | Rank in<br>BNrich | Rank in<br>PROPS | Rank in<br>Clipper | Rank in<br>BPA | Rank in<br>Ensemble |
|------------------------------------------------------|-------------------|------------------|--------------------|----------------|---------------------|
| AGE-RAGE signaling pathway in diabetic complications | 71                | 10               | 56                 | 70             | 64                  |
| AMPK signaling pathway                               | 12                | 48               | 30                 | 46             | 10                  |
| Apoptosis                                            | 31                | 94               | 31                 | 7              | 30                  |
| Bladder cancer                                       | 58                | 6                | 2                  | 4              | 9                   |
| Chagas disease                                       | 25                | 7                | 33                 | 2              | 16                  |
| Chemokine signaling pathway                          | 29                | 13               | 5                  | 25             | 7                   |
| Cytokine-cytokine receptor interaction               | 8                 | 26               | 18                 | 18             | 8                   |
| Endocrine resistance                                 | 14                | 41               | 4                  | 6              | 3                   |
| Fc epsilon RI signaling pathway                      | 3                 | 1                | 45                 | 19             | 17                  |
| Focal adhesion                                       | 9                 | NA               | 23                 | NA             | 4                   |
| GABAergic synapse                                    | 42                | 31               | 50                 | 1              | 71                  |
| Glioma                                               | 18                | 24               | 35                 | 16             | 5                   |
| Herpes simplex virus 1 infection                     | 2                 | 100              | 149                | 112            | 76                  |
| HIF-1 signaling pathway                              | 1                 | 15               | 20                 | 10             | 26                  |
| Human T-cell leukemia virus 1 infection              | 115               | 9                | 22                 | 52             | 31                  |
| Huntington disease                                   | 54                | 56               | 9                  | 20             | 32                  |
| JAK-STAT signaling pathway                           | 5                 | NA               | 21                 | 21             | 29                  |
| Leukocyte transendothelial migration                 | 39                | 66               | 8                  | 50             | 1                   |
| Longevity regulating pathway                         | 32                | 25               | 6                  | 24             | 24                  |
| Long-term depression                                 | 4                 | 39               | 7                  | 3              | 33                  |
| Melanoma                                             | 37                | 20               | 1                  | 37             | 21                  |
| Morphine addiction                                   | 68                | 8                | 46                 | 22             | 12                  |
| Natural killer cell mediated cytotoxicity            | 33                | 3                | 26                 | 26             | 70                  |
| PI3K-Akt signaling pathway                           | 28                | 17               | 10                 | 34             | 23                  |
| Platinum drug resistance                             | 10                | 29               | 16                 | 15             | 25                  |
| Prion disease                                        | 6                 | 19               | 11                 | 35             | 6                   |
| Rap1 signaling pathway                               | 7                 | 32               | 13                 | 23             | 27                  |

|                                                 |    |    |    |    |    |
|-------------------------------------------------|----|----|----|----|----|
| <b>Ras signaling pathway</b>                    | 30 | 5  | 60 | 5  | 55 |
| <b>Retrograde<br/>endocannabinoid signaling</b> | 97 | 38 | 15 | 8  | 11 |
| <b>Type II diabetes mellitus</b>                | 56 | 43 | 3  | 9  | 14 |
| <b>Vascular smooth muscle<br/>contraction</b>   | 15 | 2  | 17 | 14 | 2  |
| <b>Wnt signaling pathway</b>                    | 24 | 4  | 24 | 27 | 15 |

\*NA: Pathways failed to be reconstructed into Bayesian network.

**Supplementary Table S4.** The top ten pathways enriched by any of the five BN reconstruction methods in THCA dataset.

| Pathway Name                                         | Rank in<br>BNrich | Rank in<br>PROPS | Rank in<br>Clipper | Rank in<br>BPA | Rank in<br>Ensemble |
|------------------------------------------------------|-------------------|------------------|--------------------|----------------|---------------------|
| AGE-RAGE signaling pathway in diabetic complications | 11                | 2                | 7                  | 17             | 8                   |
| Axon guidance                                        | 7                 | 3                | 16                 | 56             | 18                  |
| cAMP signaling pathway                               | 5                 | 17               | 13                 | 9              | 7                   |
| Cell cycle                                           | 49                | 6                | 32                 | 57             | 42                  |
| Chagas disease                                       | 126               | 9                | 152                | 116            | 103                 |
| Chemical carcinogenesis - DNA adducts                | 27                | 1                | 24                 | 27             | 27                  |
| Chemokine signaling pathway                          | 19                | 39               | 18                 | 6              | 6                   |
| Complement and coagulation cascades                  | 23                | 16               | 6                  | 14             | 10                  |
| Focal adhesion                                       | 34                | NA               | 2                  | 3              | 3                   |
| Insulin resistance                                   | 151               | 7                | 150                | 42             | 133                 |
| JAK-STAT signaling pathway                           | 4                 | NA               | 4                  | 4              | 5                   |
| MAPK signaling pathway                               | 9                 | 52               | 12                 | 5              | 17                  |
| Pathways in cancer                                   | 24                | 10               | 8                  | 12             | 4                   |
| Phospholipase D signaling pathway                    | 45                | 15               | 9                  | 8              | 11                  |
| PI3K-Akt signaling pathway                           | 10                | 5                | 3                  | 2              | 2                   |
| PPAR signaling pathway                               | 3                 | 4                | 1                  | 1              | 1                   |
| Proteoglycans in cancer                              | 8                 | 23               | 15                 | 10             | 14                  |
| Rap1 signaling pathway                               | 2                 | 11               | 20                 | 13             | 13                  |
| Ras signaling pathway                                | 1                 | 12               | 5                  | 7              | 9                   |
| Regulation of actin cytoskeleton                     | 6                 | 25               | 10                 | 16             | 12                  |
| Wnt signaling pathway                                | 31                | 8                | 23                 | 26             | 36                  |

\*NA: Pathways failed to be reconstructed into Bayesian network.
